# Supplementary material for: Production of 2,3-butanediol from glucose and cassava hydrolysates by metabolically engineered industrial polyploid Saccharomyces cerevisiae
Source: PubMed Central journal article supplement (PMC6714309; doi:10.1186/s13068-019-1545-1), 2019-08-29

**Table S1. Primers used in this study.**

| <b>Primer name</b>         | <b>Sequences</b>                                                   |
|----------------------------|--------------------------------------------------------------------|
| <b>F_PDC1(stop)_repair</b> | <b>gctaagaaccagttatcttggtgatgcttgggtccagacacgacgtcaagtaagaa</b>    |
| <b>R_PDC1(stop)_repair</b> | <b>gaattgagtcaagtcaatcaacttcttagttcttacttgacgtcgtgctggaacaaca</b>  |
| <b>F_PDC5(stop)_repair</b> | <b>atttattgaaagattgagccaagtcaactgtaacaccgtcttcggttgccagtaaact</b>  |
| <b>R_PDC5(stop)_repair</b> | <b>cataaagcttatccaaaagagacaagttaaagttactggcaaaccgaagacggtgttac</b> |
| <b>F_PDC6(stop)_repair</b> | <b>ggtgtttatgtgggaacgctgtccaaccagacgtgaaacaggccgtgagtcgtaagat</b>  |
| <b>R_PDC6(stop)_repair</b> | <b>agagagcaaagcaccgaccgaaaggatcaaatcttacgactcaacggcctgttcacgtc</b> |
| <b>F1_SacI_gBlock</b>      | <b>tctacagcggccgcgagctctctttgaaaagataatgtat</b>                    |

**R2\_KpnI\_gBlock**

TATAGAGCGGCCGCGGTACCAGACATAAAAAACAAAAAAG

**R1\_ADH1\_gBlock**

ACTTACCGTGGGATTCGTAGGATCATTTATCTTTCACTGCG

**F2\_ADH1\_gBlock**

ctacgaatcccacggtaagtgttttagagctagaaatagcaagt

**F\_ADH1(noxE)\_repair**

GCACAATATTTCAAGCTATACCAAGCATAC

**R\_ADH1(noxE)\_repair**

AACCTAAGAGTCACTTTAAAATTTGTATACAC

---

**Table S2. Synthesis of the guideRNA-expressing cassettes used in this study.**

---

|                   | <b>Sequences</b>                                                                                                                                                                                                                                                                                                                                                                                                                                                  |
|-------------------|-------------------------------------------------------------------------------------------------------------------------------------------------------------------------------------------------------------------------------------------------------------------------------------------------------------------------------------------------------------------------------------------------------------------------------------------------------------------|
| <b>gRNA_dPDC1</b> | TCTACAGCGGCCGCGAGCTCTCTTTGAAAAGATAATGTATGATTATGCTTTCCTCATATTTATACAGAACTTGAT<br>GTTTTCTTTTCGAGTATATACAAGGTGATTACATGTACGTTTGAAGTACAACCTCTAGATTTTGTAGTGCCCTCTGGG<br>CTAGCGGTAAAGGTGCGCATTTTTTTCACACCCTACAATGTTCTGTTCAAAAGATTTTGGTCAAACGCTGTAGAAG<br>TGAAAGTTGGTGCGCATGTTTCGGCGTTCGAAACTTCTCCGCAGTGAAAGATAAATGATCTTGTTCCAGACACGA<br>CGTCAGTTTTAGAGCTAGAAATAGCAAGTTAAAATAAGGCTAGTCCGTTATCAACTTGAAAAAGTGGCACCGAGT<br>CGGTGGTGCTTTTTTTTGTTTTTTATGTCTGGTACCGCGGCCGCTCTATA |
| <b>gRNA_dPDC5</b> | TCTACAGCGGCCGCGAGCTCTCTTTGAAAAGATAATGTATGATTATGCTTTCCTCATATTTATACAGAACTTGAT<br>GTTTTCTTTTCGAGTATATACAAGGTGATTACATGTACGTTTGAAGTACAACCTCTAGATTTTGTAGTGCCCTCTGGG<br>CTAGCGGTAAAGGTGCGCATTTTTTTCACACCCTACAATGTTCTGTTCAAAAGATTTTGGTCAAACGCTGTAGAAG<br>TGAAAGTTGGTGCGCATGTTTCGGCGTTCGAAACTTCTCCGCAGTGAAAGATAAATGATCAACACCGTCTTCGGT                                                                                                                                      |

---

---

TTGCCGTTTTAGAGCTAGAAATAGCAAGTTAAAATAAGGCTAGTCCGTTATCAACTTGAAAAAGTGGCACCGAGT

CGGTGGTGCTTTTTTTGTTTTTATGTCTGGTACCGCGGCCGCTCTATA

**gRNA\_dPDC6**

TCTACAGCGGCCGCGAGCTCTCTTTGAAAAGATAATGTATGATTATGCTTTCCTCATATTTATACAGAACTTGAT

GTTTTCTTTCGAGTATATACAAGGTGATTACATGTACGTTGAAGTACAACCTAGATTTTGTAGTGCCCTCTGGG

CTAGCGGTAAAGGTGCGCATTTTTTTCACACCCTACAATGTTCTGTTCAAAAGATTTTGGTCAAACGCTGTAGAAG

TGAAAGTTGGTGCGCATGTTTCGGCGTTCGAAACTTCTCCGCAGTGAAAGATAAATGATCCGTGAAACAGGCCG

TTGAGTGTTTTAGAGCTAGAAATAGCAAGTTAAAATAAGGCTAGTCCGTTATCAACTTGAAAAAGTGGCACCGAG

TCGGTGGTGCTTTTTTTGTTTTTATGTCTGGTACCGCGGCCGCTCTATA

---

Figure S1. Fermentation of the *PDC* disrupted strains.

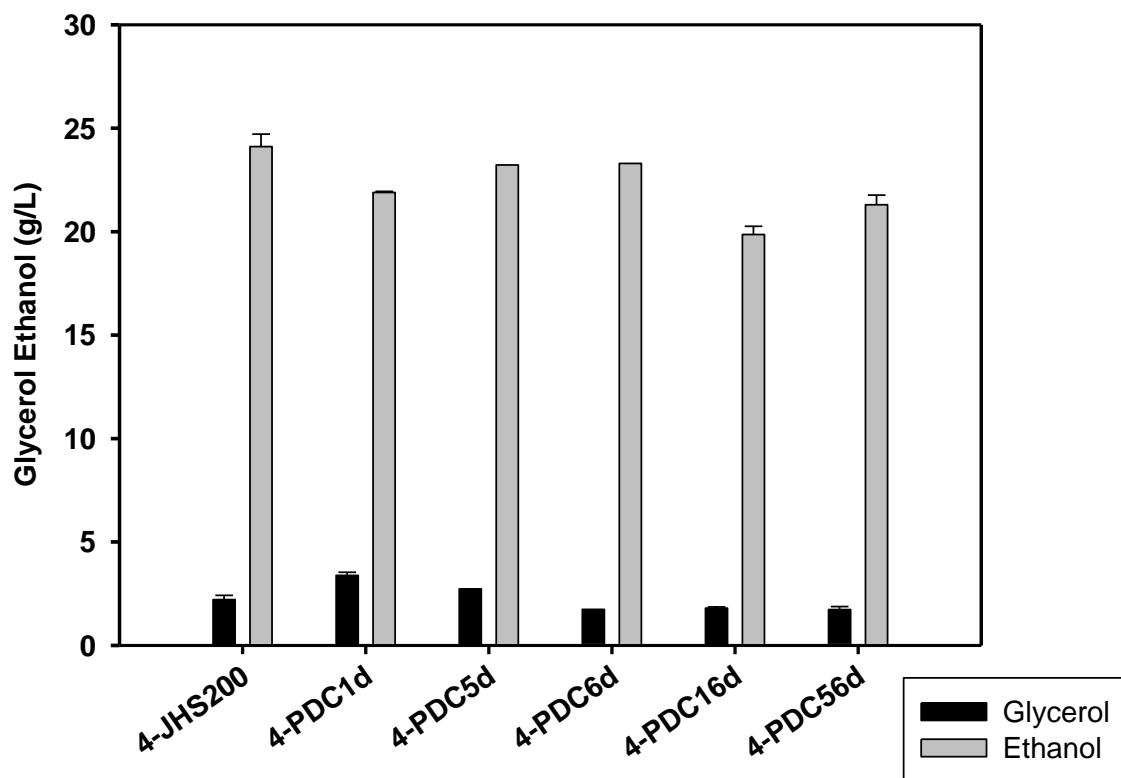

Figure S2. Fermentation profile of the YG01 strain.

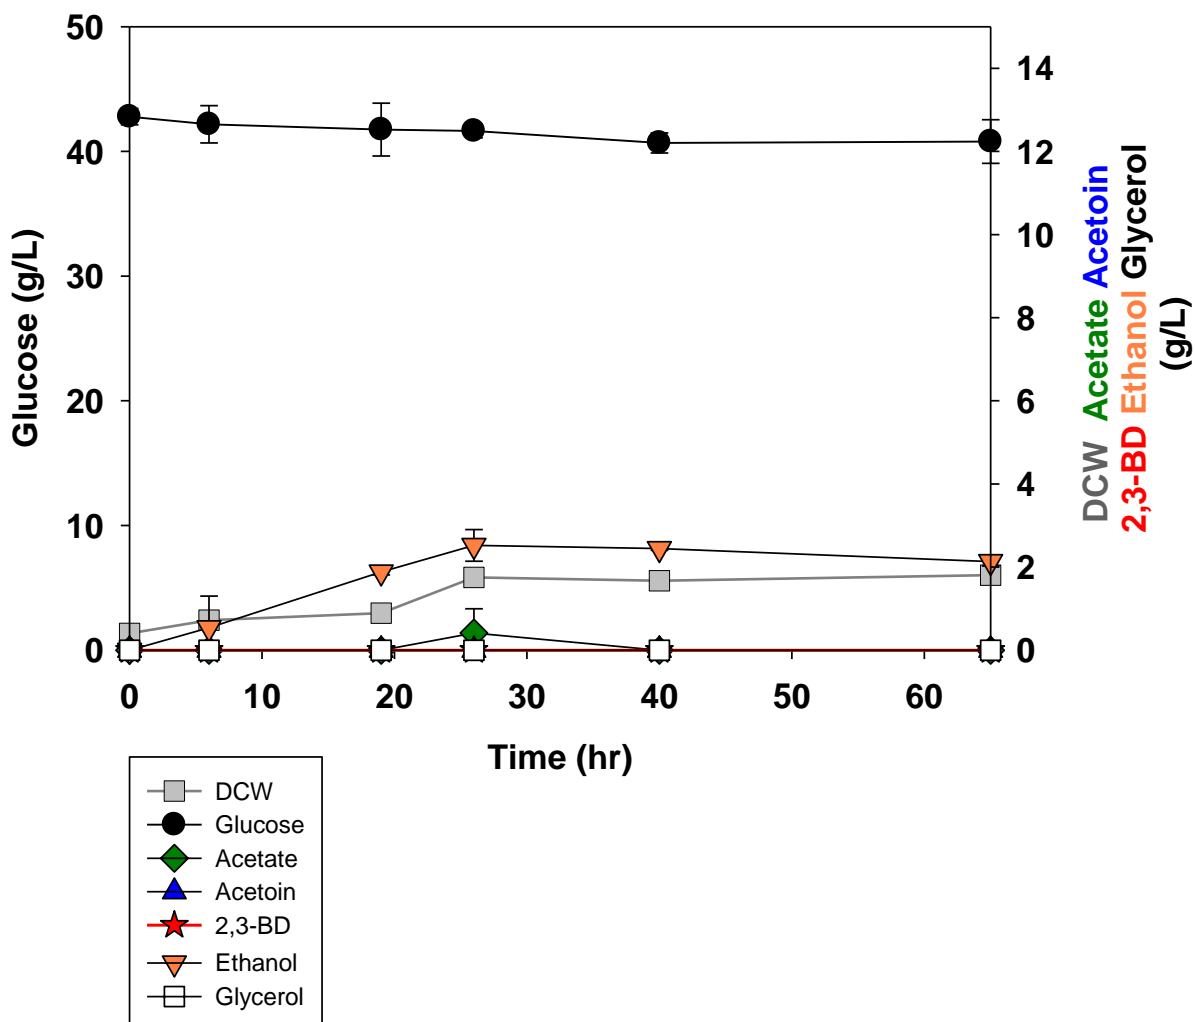

Figure S3. Fermentation profile of the YG02 strain.

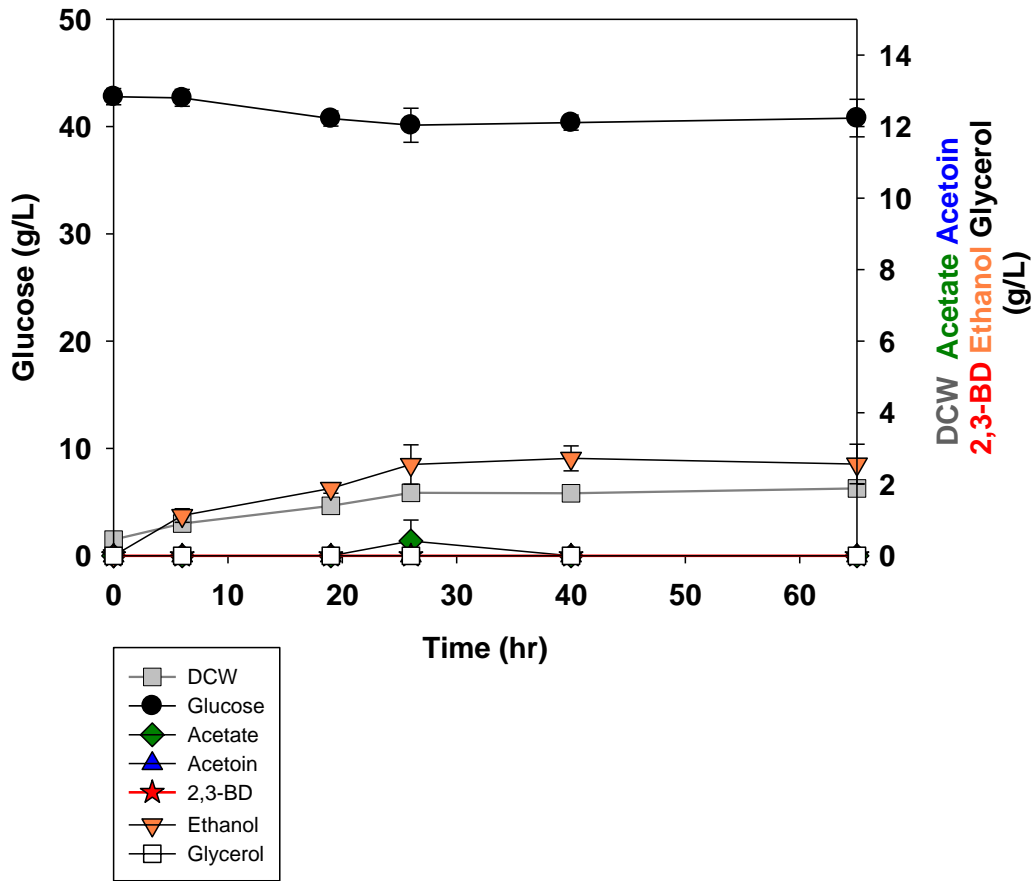

**Figure S4. Confirmation of disrupting *PDC 1* and *6* in industrial polyploid *S. cerevisiae* after the several passage of cultivation.**

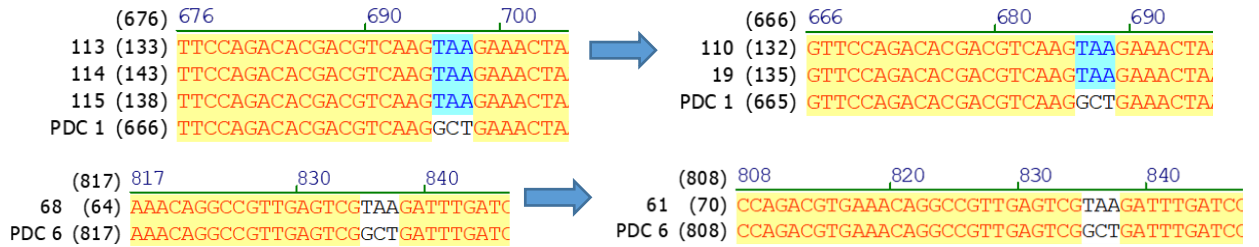

Supplement: 13068_2019_1545_MOESM1_ESM.pdf [file 13068_2019_1545_MOESM1_ESM.pdf]
